# Supplementary material
Source: publisher site journal article supplement (https://jmir.org/api/download?alt_name=publichealth_v9i1e48449_app1.docx&filename=1f8ef015d65cba691fa5d8f06e8e41d7.docx)
Supplement: Supplementary file 1 [file download]

**Statistical Analysis**

Descriptive analyses were conducted and the temporal trends were expressed as annual percentage change (APC) and average annual percentage change (AAPC).

APC = ( eβ − 1 ) × 100%

AAPC = { exp ∑ wibi ∕ ∑ wi − 1 } × 100%

The trends of age-standardized SEV, ASMR, ASDR, and ASPAF were further assessed by joinpoint regression analysis on a log scale, since these measures followed a Poisson distribution [13].

ln (y) = α + βx + ε

where y is the mortality/DALYs rate, α is the constant term, β is the regression coefficient, and ε is the random error term.

Furthermore, we used an APC model to analyze the effects of age, period, and cohort on mortality and the DALYs of GEC cases attributable to dietary factors. The APC model was based on a log-linear model for the rate, with additive effects from age, calendar period, and birth cohort, as shown in the formula below[14]:

Logλij = µ + αi + βj + γk i = 1, 2, . . . , I,

j = 1, 2, . . . , J,

k = j − i + I.

In the above formula, µ refers to the intercept term, αi refers to the age effects, βj refers to the period effects, and γk refers to the cohort. We present the APC results in this study, including following four items: (1) net drift, which represents the annual percentage change of the expected age-adjusted rates over time, (2) local drifts, which assess the annual percentage change of the expected age-specific rates over time, (2) the longitudinal age curve, which shows the fitted longitudinal age-specific rates in the reference cohort, adjusted for period deviations, (3) period rate ratios (RRs), the ratio of age-specific rates in each period relative to the reference period, and (4) cohort RRs, the ratio of age-specific rates in each cohort relative to the reference cohort. The longitudinal age curve, time period RR, and cohort RR represent the age, period, and cohort effect, respectively. The median of age group, period, and birth cohort were defined as the references.

Then, we utilized a Bayesian APC model of integrated nested Laplace approximations (the R packages, BAPC, and INLA) to predict the number of deaths, DALYs, ASMR, and ASDR of dietary carcinogen-attributable GEC cases from 2019 to 2044. Briefly, Bayesian inference treats all unknown parameters as random with appropriate prior distributions, and INLA have been shown to be useful to perform Markov chain Monte Carlo (MCMC)-free inference in APC models and Bayesian hierarchical models[15] . In addition, we assumed the inverse gamma prior distribution of age, period, and cohort effects and applied a second-order random walk (RW2), which assumes independent mean-zero normal distributions (with unknown variance) on the second differences of all time effects, to adjust for excessive dispersion [16]. Additionally, we obtained the estimated population of China from 2020 to 2050 from the Global Health Data Exchange website (https://ghdx.healthdata.org/record/ihme-data/global-population-forecasts-2017-2100). This approach used inputs of population by age and sex in 2017, sex ratios at birth in 2017, and forecasted for age-specific fertility rates, age-specific mortality rates, and net migration for all locations through 2100. This analysis complied with the Guidelines on Accurate and Transparent Health Estimate Reporting[17, 18] .

Finally, we also used a recently developed decomposition method to attribute changes in the total number of GEC deaths and DALYs, from dietary factors to population growth, population aging, and age-specific changes between 2019 and 2044 [19, 20]. Compared with previous studies[21-23], the recently developed method was insensitive to the decomposition order of the 3 components (population growth, population ageing, and mortality change) and the choice of reference group [20], enhancing the stability of our results. Briefly, we calculated the contributions of the 3 components based on the following formulas:

where Ma, Mp, and Mm indicate the main effects of population ageing, population growth, and mortality change, respectively; Ipa, Ipm, Iam, and Ipam denote the 2-way and 3-way interactions; mij and sij denote the age-specific mortality rate and proportion of population, respectively, for the *i*th age group in the *j*th year (i = 1, 2, . . ., 20; j = 1, 2); and N1 and N2 represent the population size for group 1 and group 2, respectively. The change in the number of deaths can then be attributed to population ageing, population growth, and change of age-specific mortality rate as follows:

All statistical analyses were performed using R 3.6.0.
